# Supplementary material for: Molecular mechanism of the allosteric regulation of the αγ heterodimer of human NAD-dependent isocitrate dehydrogenase
Source: Sci Rep. 2017 Jan 18;7:40921. doi: 10.1038/srep40921 (PMC5241874; doi:10.1038/srep40921)

## SUPPLEMENTARY INFORMATION

Molecular mechanism of the allosteric regulation of the  $\alpha\gamma$  heterodimer of human NAD-dependent isocitrate dehydrogenase

**Tengfei Ma<sup>1</sup>, Yingjie Peng<sup>1</sup>, Wei Huang<sup>1</sup>, and Jianping Ding<sup>1,2,3,4,\*</sup>**

<sup>1</sup> National Center for Protein Science Shanghai, State Key Laboratory of Molecular Biology, Center for Excellence in Molecular Cell Science, Institute of Biochemistry and Cell Biology, Shanghai Institutes for Biological Sciences, Chinese Academy of Sciences, 320 Yueyang Road, Shanghai 200031, China

<sup>2</sup> School of Life Science and Technology, ShanghaiTech University, 100 Haik Road, Shanghai 201210, China

<sup>3</sup> Shanghai Science Research Center, Chinese Academy of Sciences, 333 Haik Road, Shanghai 201210, China

<sup>4</sup> Collaborative Innovation Center for Genetics and Development, Fudan University, 2005 Songhu Road, Shanghai 200438, China

\*To whom correspondence should be addressed: Jianping Ding (Phone: 86-21-5492-1619, E-mail: [jpding@sibcb.ac.cn](mailto:jpding@sibcb.ac.cn)).

**Table S1. Pair-wise superposition of the  $\alpha\gamma$  heterodimer in different structures.**

| Overall RMSD (Å)*                                 | $\alpha^{\text{Mg}}\gamma$ | $\alpha^{\text{Mg}}\gamma^{\text{Mg+CIT}}$ | $\alpha^{\text{Mg}}\gamma^{\text{Mg+CIT+ADP}}$ | $\alpha^{\text{Mg}}\gamma^{\text{Mg+ICT+ADP}}$ |
|---------------------------------------------------|----------------------------|--------------------------------------------|------------------------------------------------|------------------------------------------------|
| $\alpha^{\text{Mg}}\gamma^{\text{Mg+CIT}}$        | 1.2 (652)                  | ----                                       |                                                |                                                |
| $\alpha^{\text{Mg}}\gamma^{\text{Mg+CIT+ADP}}$    | 1.0 (654)                  | 0.6 (659)                                  | ----                                           |                                                |
| $\alpha^{\text{Mg}}\gamma^{\text{Mg+ICT+ADP}}$    | 1.2 (653)                  | 0.4 (659)                                  | 0.6 (659)                                      | ----                                           |
| $\alpha\gamma_{\text{K151A}}^{\text{Mg+CIT+ADP}}$ | 0.8 (657)                  | 0.8 (654)                                  | 0.8 (658)                                      | 0.8 (653)                                      |

\* Numbers in parentheses are the numbers of C $\alpha$  atoms used in the superposition.

**Figure S1. Representative simulated annealing composite omit  $2Fo-Fc$  maps at the active and allosteric sites of the  $\alpha\gamma$  heterodimer in different structures.**

(a) The active site in the  $\alpha^{\text{Mg}}\gamma$  structure (contoured at  $1.0\sigma$  level). (b) The active site in the  $\alpha^{\text{Mg}}\gamma^{\text{Mg+CIT}}$  structure (contoured at  $2.0\sigma$  level). (c) The allosteric site in the  $\alpha^{\text{Mg}}\gamma^{\text{Mg+CIT}}$  structure (contoured at  $2.0\sigma$  level). (d) The allosteric site in the  $\alpha^{\text{Mg}}\gamma^{\text{Mg+CIT+ADP}}$  structure (contoured at  $1.0\sigma$  level). (e) The allosteric site in the  $\alpha^{\text{Mg}}\gamma^{\text{Mg+ICT+ADP}}$  structure (contoured at  $1.0\sigma$  level). (f) The allosteric site in the  $\alpha^{\text{Mg}}\gamma^{\text{K151A+Mg+CIT+ADP}}$  structure (contoured at  $1.0\sigma$  level). The residues and ligands are shown with ball-and-stick models, and the  $\text{Mg}^{2+}$  and water molecules are shown with green and red spheres, respectively. The coordination bonds of the metal ion are indicated with dashed lines.

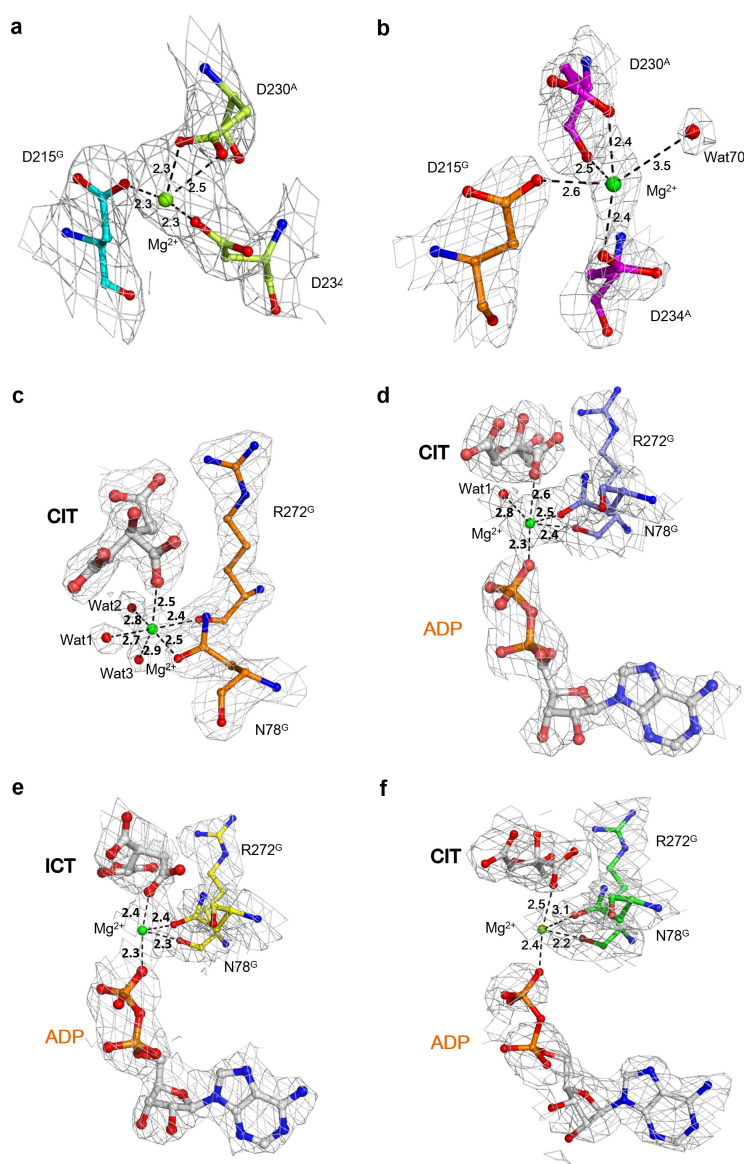

**Figure S2. Structure-based sequence alignment of the  $\alpha$  and  $\gamma$  subunits of human NAD-IDH with several representative IDHs.** The sequences of other IDHs included in the alignment are: the IDH1 and IDH2 subunits of *S. cerevisiae* NAD-IDH (ScIDH1 and ScIDH2, PDB code 3BLX), human cytosolic NADP-IDH (HcIDH, PDB code 1T0L), porcine mitochondrial NADP-IDH (PmIDH, PDB code 1LWD), and *E. coli* NADP-IDH (EcIDH, PDB code 1IKB). Invariant residues are highlighted by shaded red boxes and conserved residues by open blue boxes. The secondary structures of these enzymes are placed on the top of the alignment.

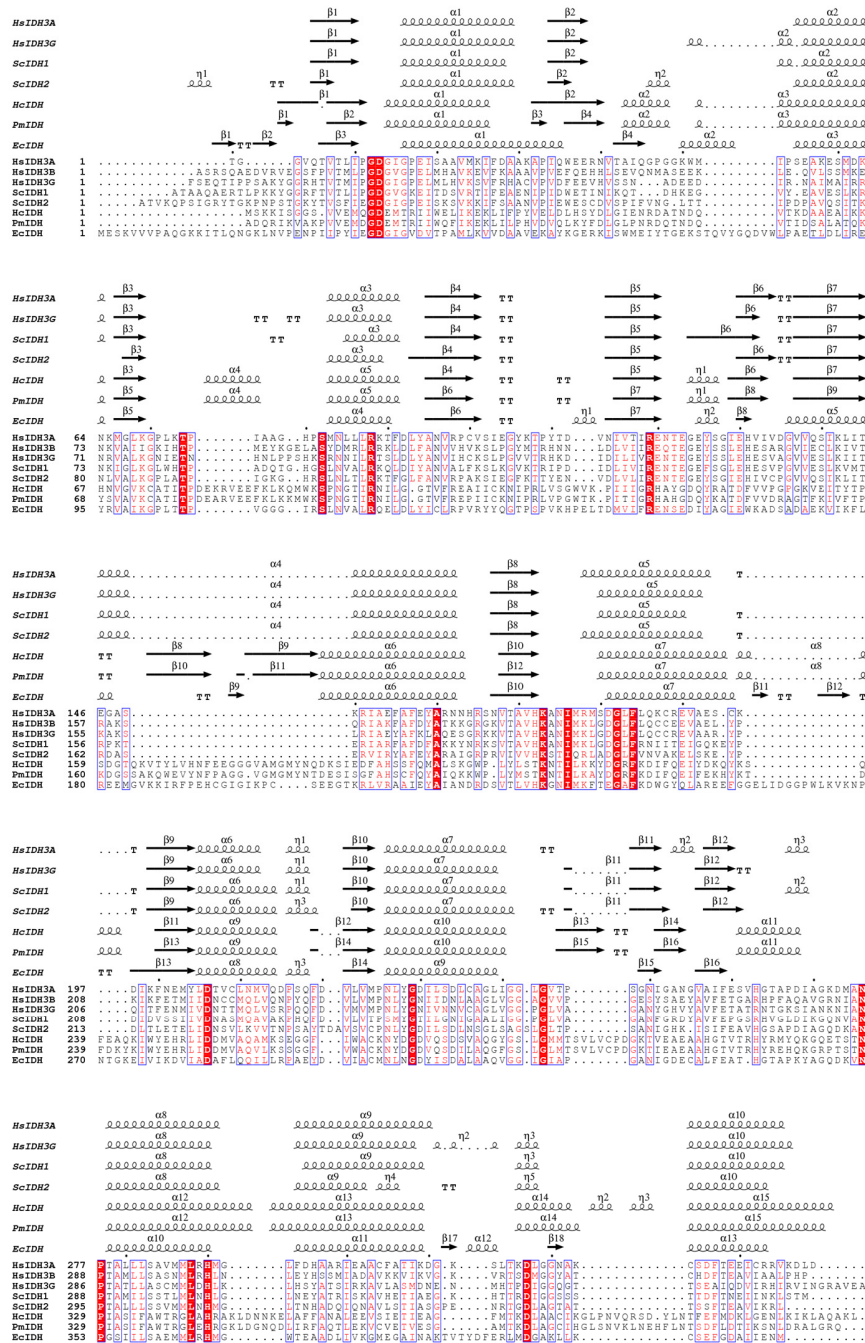

**Figure S3. Comparison of the active sites of the  $\alpha^{\text{Mg}}\gamma^{\text{Mg+CIT}}$  structure (orange), the  $\text{PmIDH}^{\text{Mn+ICT}}$  structure (porcine mitochondrial NADP-IDH, PDB code 1LWD, magenta), and the  $\text{HcIDH}^{\text{Ca+ICT+NADP}}$  structure (human cytosolic NADP-IDH, PDB code 1T0L, blue). For clarity, only the hydrogen-bonding interactions of ICT with the surrounding residues in the  $\text{PmIDH}^{\text{Mn+ICT}}$  structure are shown.**

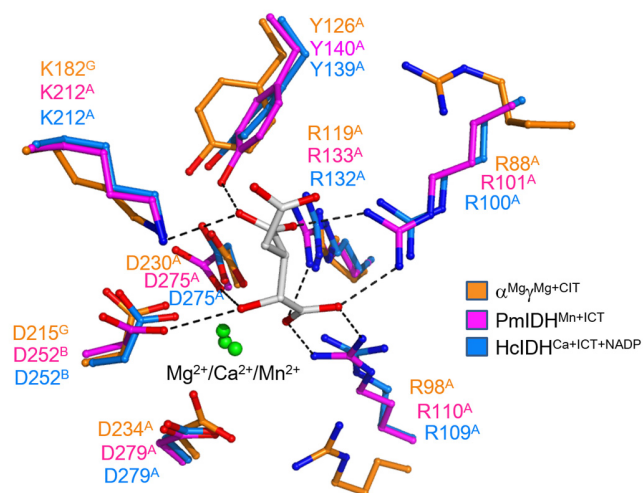

**Figure S4. Comparison of the  $\alpha\gamma$  heterodimer in different structures.**

(a) Comparison of the allosteric site, the active site, and the structure elements at the heterodimer interface in the  $\alpha^{\text{Mg}}\gamma^{\text{Mg+CIT}}$  (orange),  $\alpha^{\text{Mg}}\gamma^{\text{Mg+CIT+ADP}}$  (slate),  $\alpha^{\text{Mg}}\gamma^{\text{Mg+ICT+ADP}}$  (yellow), and  $\alpha\gamma_{\text{K151A}}^{\text{Mg+CIT+ADP}}$  (green) structures. The orientations of the  $\alpha 6$  and  $\alpha 7$  helices in the  $\alpha$  and  $\gamma$  subunits are indicated with dashed arrows. Some key residues involved in the conformational changes are shown with side chains. (b) Comparison of the CIT-binding subsite in the  $\alpha^{\text{Mg}}\gamma^{\text{Mg+CIT}}$  (orange),  $\alpha^{\text{Mg}}\gamma^{\text{Mg+CIT+ADP}}$  (slate),  $\alpha^{\text{Mg}}\gamma^{\text{Mg+ICT+ADP}}$  (yellow), and  $\alpha\gamma_{\text{K151A}}^{\text{Mg+CIT+ADP}}$  (green) structures. The bound CIT (or ICT) is shown with a ball-and-stick model, the  $\text{Mg}^{2+}$  with a green sphere, and the surrounding residues with side chains. (c) Comparison of the active site in the  $\alpha^{\text{Mg}}\gamma$  (cyan),  $\alpha^{\text{Mg}}\gamma^{\text{Mg+CIT}}$  (orange),  $\alpha^{\text{Mg}}\gamma^{\text{Mg+CIT+ADP}}$  (slate),  $\alpha^{\text{Mg}}\gamma^{\text{Mg+ICT+ADP}}$  (yellow), and  $\alpha\gamma_{\text{K151A}}^{\text{Mg+CIT+ADP}}$  (green) structures. The  $\text{Mg}^{2+}$  is shown with a green sphere and the surrounding residues with side chains.

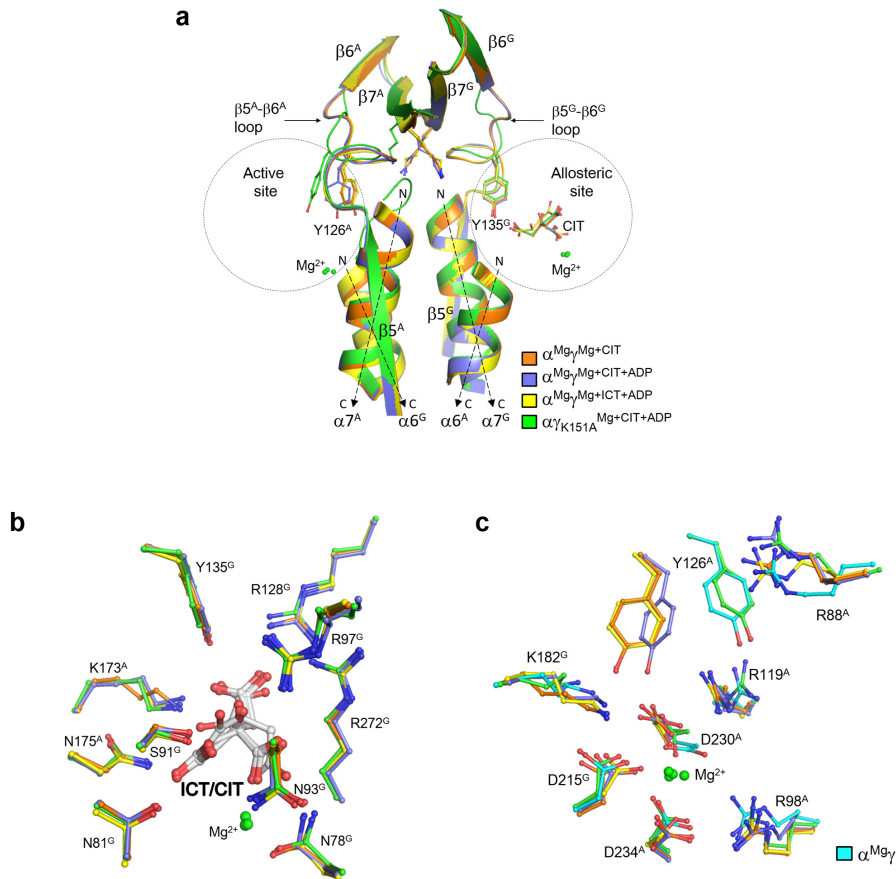

**Figure S5. Sequence alignment of NAD-IDHs from different eukaryotic species.** The sequences included in the alignment are: the  $\alpha$ ,  $\beta$ ,  $\gamma$  subunits of human NAD-IDH (HsIDH3A, HsIDH3B, and HsIDH3G); the IDH1 and IDH2 subunits of *Saccharomyces cerevisiae* NAD-IDH (ScIDH1 and ScIDH2); the  $\alpha$ ,  $\beta$ ,  $\gamma$ 1 and  $\gamma$ 2 subunits of *Caenorhabditis elegans* NAD-IDH (CeIDH3A, HsIDH3B, HsIDH3G1, and HsIDH3G2); the IDH1, IDH2, IDH3, IDH5 and IDH6 subunits of *Arabidopsis thaliana* NAD-IDH (AtIDH1, AtIDH2, AtIDH3, AtIDH5, and AtIDH6); the  $\alpha$ ,  $\beta$  and  $\gamma$  subunits of *Danio rerio* NAD-IDH (DrIDH3A, DrIDH3B, and DrIDH3G); and the  $\alpha$ ,  $\beta$  and  $\gamma$  subunits of *Xenopus laevis* NAD-IDH (XlIDH3A, XlIDH3B, and XlIDH3G). Invariant residues are highlighted by shaded red boxes and conserved residues by open blue boxes. The residues corresponding to those composing the allosteric site and the active site in the  $\alpha\gamma$  heterodimer of human NAD-IDH are indicated with red triangles, and those involved in the conformational changes at the heterodimer interface with blue stars.

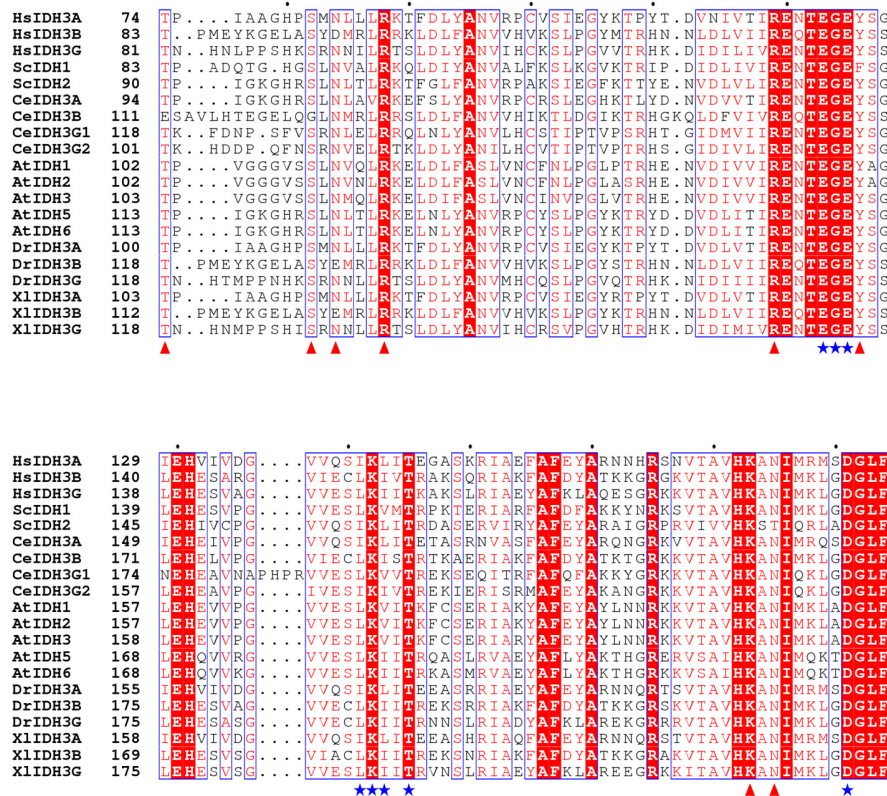

HsIDH3A 185 LQKCR.EVA..ESCKD.IKF.NE.MYLD.TVC.LNMVQD.PSQFD..VLVMPNLYGDIISDLCAGLIG  
 HsIDH3B 196 LQCCCEVA..ELYPKIKFETMIIDNCCMQTVQNPYQFD..VLVMPNLYGNIIDNLAAGLVG  
 HsIDH3G 194 LQCCCEVA..ARYPQITFENMIVDNTT.MQTVSRPQQFD..VMVMPNLYGNIIVNNVCAAGLVG  
 ScIDH1 195 RNIIITEIGQKEYPDIDVSSIIVDNASMQAVAKPHQFD..VLVTPSMYGTILGNIGAGLIG  
 ScIDH2 201 VNVAKEL.SKEYPDILLETTELIDNSVLKVVTNP.SAYTDA.VSVGPNLYGDIISDNLNSSLGA  
 CeIDH3A 205 LSICREQA..ALYPDIKFKEAYLD.TVC.LNMVQD.PSQYD..VLVMPNLYGDIISDLCAGLVG  
 CeIDH3B 227 LRTCEGVA..KQYPKIQFESMIIDNTC.MQTVSKPQQFD..VMVMPNLYGNIIDNLAAGLVG  
 CeIDH3G1 234 LKVATDIAKAEYPDIEFNAMIVDNASMQTVSRPQQFD..VMLMPNLYGNIISNLIACGLVG  
 CeIDH3G2 213 LKVVRDMS..EDYKDIKFTEAMIVDNASMQTVSKPQQFD..VMVMPNLYGNIISNLIACGLVG  
 AtIDH1 213 LESCREVA..KKYPSIIYNEIIVDNCCMQTVAKPQQFD..VMVTPNLYGNLVANTAAGIAG  
 AtIDH2 213 LESQCEVA..KKYPSLAIYNEIIVDNCCMQTVAKPQQFD..VMVTPNLYGNLVANTAAGIAG  
 AtIDH3 214 LESCREVA..KHYSGITTYEEVVIDNCCMQTVAKPQQFD..VMVTPNLYGNLVANTAAGIAG  
 AtIDH5 224 LKCCCEVA..EKYPEITTYEEVVIDNCCMMTVKNPALFD..VLVMPNLYGDIISDLCAGLVG  
 AtIDH6 224 LQCCCEVA..AKYPEITTYEKVVIDNCCMMTVKNPALFD..VLVMPNLYGDIISDLCAGLVG  
 DrIDH3A 211 LRKCREVA..ENFKDVKEFTEMYLD.TVC.LNMVQD.PSQFD..VLVMPNLYGDIISDLCAGLVG  
 DrIDH3B 231 LQSCAEVA..ELYPKIKYENVIIDNCCMQTVQNPYQFD..VLVMPNLYGNIIDNLAAGLVG  
 DrIDH3G 231 LQCCCEVA..SGYPDIEFNMIVDNTT.MQTVSKPYQFD..VMVMPNLYGNIIVNNVCAAGLVG  
 XlIDH3A 214 LKKCREVA..ENFKDIKFENMYLD.TVC.LNMVQD.PQQFD..VLVMPNLYGDIISDLCAGLVG  
 XlIDH3B 225 LQCCCEVA..ELYPKIQFDTMIIDNCCMQTVQNPYQFD..VLVMPNLYGNIIVNNVCAAGLVG  
 XlIDH3G 231 LQCCCEVA..SGYPDITEESMIVDNTT.MQTVSNPQQFD..VMVMPNLYGNIIVNNVCAAGLVG

HsIDH3A 242 G..LGVT.PSGNIGANGVAIFESVHG...TAPD.IAGKD.MANPTALLLSAVMMLRHMGLFDHA  
 HsIDH3B 253 G..AGVVPGESYSAEYAVFETGARH...PFAQAVGRNIANPTAMLLSASNMLRHLNLEYHS  
 HsIDH3G 251 G..PGLVAGANYGHVYAVFETATRN...TGKSIANKNIANPTATLLSASCMMLDHLKLSHYA  
 ScIDH1 253 G..PGLVAGANFGRDYAVFEPGSRH...VGLDIKGQNVANPTAMILSSTLMNLNHLGLNEYA  
 ScIDH2 260 G.SGLTPSGNIGK.G.AAVFESVHG...SAPDIAGQDKANPTALLLSVMMMLNHMGLTNHA  
 CeIDH3A 262 G..LGVT.PSGNIGK.G.AAVFESVHG...TAPDIAGQDKANPTALLLSAVMMLRYMNLPOHA  
 CeIDH3B 284 G..AGVVPQS.VGRDFVIFEPGSRH...SFQEAMGRSIANPTAMILCAANMMLNHLHLDAWG  
 CeIDH3G1 292 G..PGLVSGMNLGEDIYAVFETGTRN...TGTTLAGKDIANPTAFIRAAVDMLEFLGLQSHA  
 CeIDH3G2 270 G..PGLVSGMNLGDKYAVFETGTRN...TGTTLAGKDIANPTAFIRASVDMLEFLGLCHYHA  
 AtIDH1 270 G..TGVMPPGGNVGADHVAIFEQGASAGNVGKDKIVLENKANPVALLLSSAMMLRHLLOFPSSFA  
 AtIDH2 270 G..TGVMPPGGNVGAEYAVFEQGASAGNVGKDTTEEQKNANPVALLLSSAMMLRHLLOFPSSFA  
 AtIDH3 271 G..TGVMPPGGNVGAEHAIIFEQGASAGNVGNDKMMVEQKKANPVALLLSSAMMLRHLRFPSTFA  
 AtIDH5 281 G..LGLTPSCNIGEDGVALAEAVHG...SAPDIAGKNIANPTALLLSGVMMMLRHLKFNQEA  
 AtIDH6 281 G..LGLTPSMNIGEDGIALAEAVHG...SAPDIAGMNIANPTALLLSGVMMMLRHLKFNKQA  
 DrIDH3A 268 G..LGVT.PSGNIGANGVAIFESVHG...TAPDIAGKDMANPTALLLSAVMMLRHMGLHGHHA  
 DrIDH3B 288 G..AGVVPGESYSAEYAVFETGARH...PFAQAVGRNIANPTAMLLSASNMLRHLNLEYHS  
 DrIDH3G 288 G..PGLVPGANYGRDYAVFETATRN...TGKSIANRNIANPTAMLLSASCLMLDHLKLDHYA  
 XlIDH3A 271 G..LGVT.PSGNIGANGVAIFESVHG...TAPDIAGKDFANPTALLLSAVMMLRHMGLHEYG  
 XlIDH3B 282 G..AGVVPGESYSSEYAVFETGARH...PFAQAVGRNIANPTAMLLSATNMMLRHLNLEYHS  
 XlIDH3G 288 G..PGLVPGANYGVYAVFETATRN...TGKSIANKNIANPTAMLLASCMMLDHLKLSHYA

**Figure S6. Structural comparison of the  $\alpha\gamma$  heterodimer of human NAD-IDH and the IDH1/IDH2 heterodimer of yeast NAD-IDH.** Structural comparison of human  $\alpha\gamma$  heterodimer and yeast IDH1/IDH2 heterodimer at the allosteric site, the active site, and the heterodimer interface in the apo form (top panel) and the CIT-bound form (bottom panel). The  $\alpha$  and  $\gamma$  subunits in the  $\alpha^{Mg}\gamma$  structure are colored in lemon and cyan, and these in the  $\alpha^{Mg}\gamma^{Mg+CIT}$  structure in magenta and orange, respectively. The IDH1 and IDH2 subunits in the apo structure (PDB code: 3BLX) are colored in pink and slate, and these in the CIT-bound structure (PDB code: 3BLV) in green and yellow, respectively. For easy comparison, we use the same secondary structure nomenclature for both human  $\alpha\gamma$  heterodimer and yeast IDH1/IDH2 heterodimer. The structure elements and residues of the IDH1 and IDH2 subunits are superscripted by “1” and “2”, respectively. The key residues are shown with side chains. The orientations of the  $\alpha 6$  and  $\alpha 7$  helices in both subunits are indicated with dashed arrows.

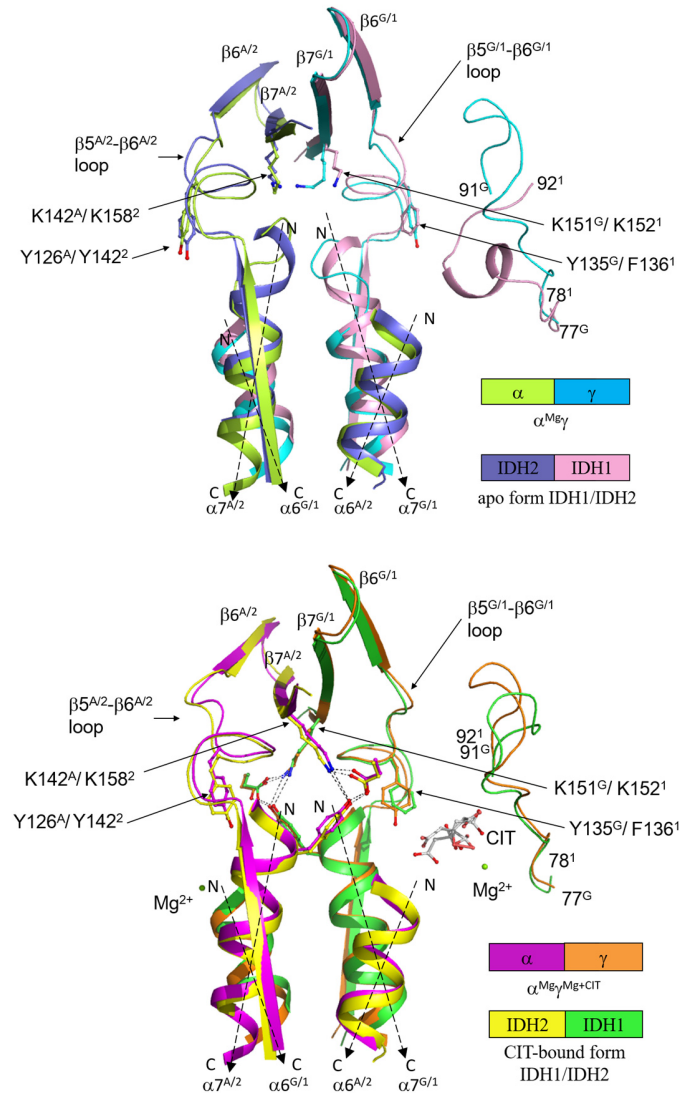

**Figure S7. Structural comparison of the apo and CIT-bound IDH1/IDH2 heterodimer of yeast NAD-IDH.**

(a) Comparison of the apo and CIT-bound IDH1/IDH2 structures at the allosteric site, the active site, and the heterodimer interface. The IDH1 and IDH2 subunits in the apo structure are colored in pink and slate, respectively; and these in the CIT-bound structure are colored in green and yellow, respectively. For easy comparison, we use the same secondary structure nomenclature for both human  $\alpha\gamma$  heterodimer and yeast IDH1/IDH2 heterodimer. The structure elements and residues of the IDH1 and IDH2 subunits are superscripted by “1” and “2”, respectively. The key residues are shown with side chains. Upon the binding of CIT, significant conformational changes are observed at the residues 78<sup>1</sup>-92<sup>1</sup> of IDH1, the C-terminal region of the  $\beta$ 5- $\beta$ 6 loop and the  $\beta$ 7 strand of both the IDH1 and IDH2 subunits at the heterodimer interface. The orientations of the  $\alpha$ 6 and  $\alpha$ 7 helices in both subunits are indicated with dashed arrows. The zoom-in panel on the right top shows the conformational changes of the  $\beta$ 7<sup>1</sup> and  $\beta$ 7<sup>2</sup> strands. For clarity, only the hydrogen-bonding interactions between the main chains of the residues are shown and the side chains are omitted. The  $\beta$ 7<sup>A</sup> and  $\beta$ 7<sup>G</sup> strands bend towards the  $\alpha$ 6<sup>1</sup>- $\alpha$ 7<sup>1</sup> and  $\alpha$ 6<sup>1</sup>- $\alpha$ 7<sup>1</sup> four-helix bundle, with the C $\alpha$  atoms of Ser150<sup>1</sup>, Leu151<sup>1</sup> and Lys152<sup>1</sup> of the  $\beta$ 7<sup>1</sup> strand and Ser156<sup>2</sup>, Ile157<sup>2</sup> and Lys158<sup>2</sup> of the  $\beta$ 7<sup>2</sup> strand (indicated with black arrows) shifting about 2Å.

(b) Structure of the allosteric site in the apo (left panel) and CIT-bound (right panel) IDH1/IDH2 structures. In the apo structure, residues 78-92 adopt a helical conformation which block the CIT-binding site; in the CIT-bound structure, residues 78-92 adopt a loop conformation. The hydrophilic interactions between CIT and the surrounding residues are indicated with dashed lines and several key residues are shown with side chains.

(c) Structure of the heterodimer interface in the apo (left panel) and CIT-bound (right panel) IDH1/IDH2 structures. The structure elements at the heterodimer interface that undergo major conformational changes upon the CIT binding include the  $\beta$ 5- $\beta$ 6 loop and the  $\beta$ 7 strand of both IDH1 and IDH2 subunits. Several key residues are shown with side chains. For clarity, only the hydrogen-bonding interactions that are altered upon the CIT binding are indicated with dashed lines.

(d) A schematic diagram showing the hydrogen-bonding interactions among the  $\beta$ 5- $\beta$ 6 loop, the  $\alpha$ 7 helix, the  $\beta$ 7 strand, and the  $\alpha$ 5 helix of both IDH1 and IDH2 subunits in the apo and CIT-bound IDH1/IDH2 structures. The interactions in the apo structure are indicated with green lines; these disrupted upon the CIT binding are indicated with dashed green lines, and the newly formed interactions are indicated with red lines.

**a**

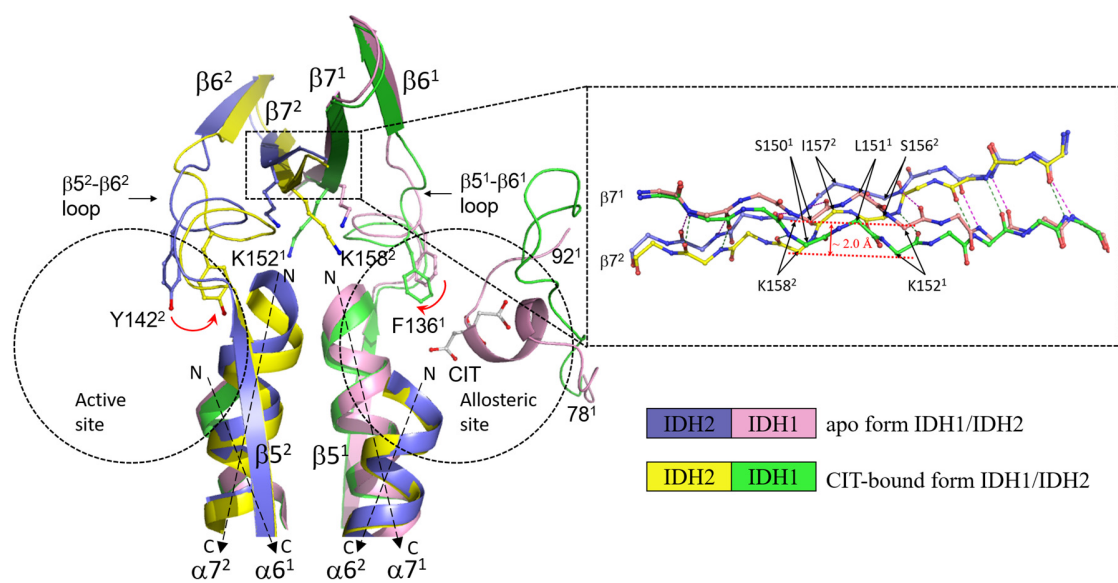

**b**

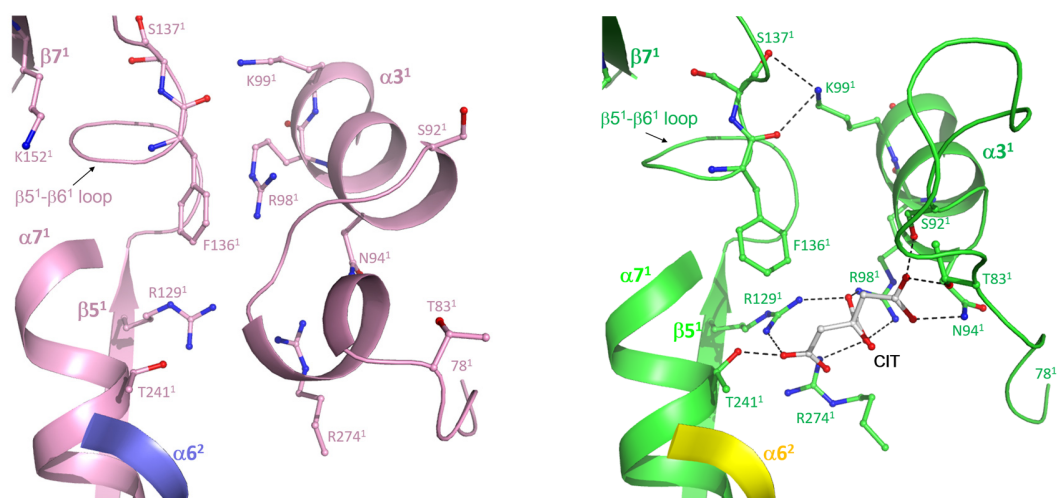

c

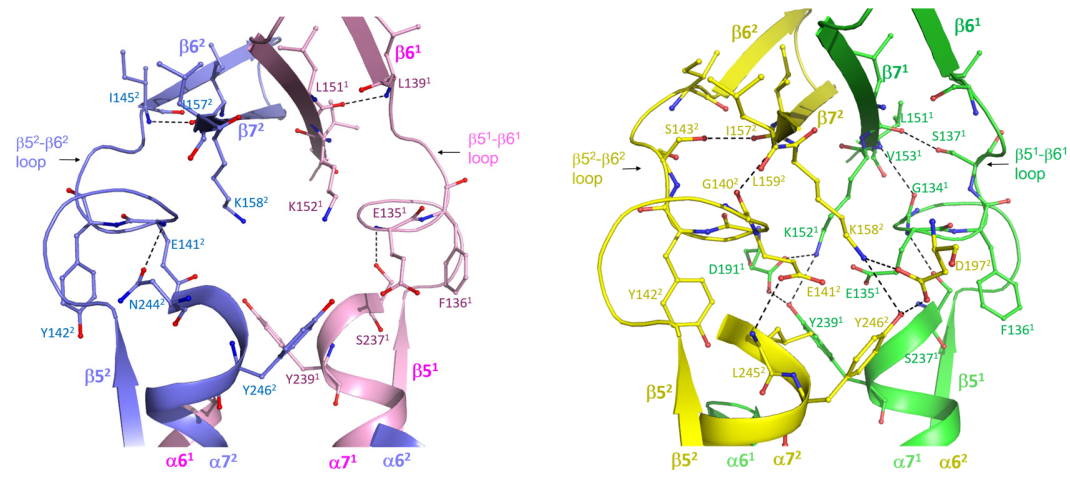

d

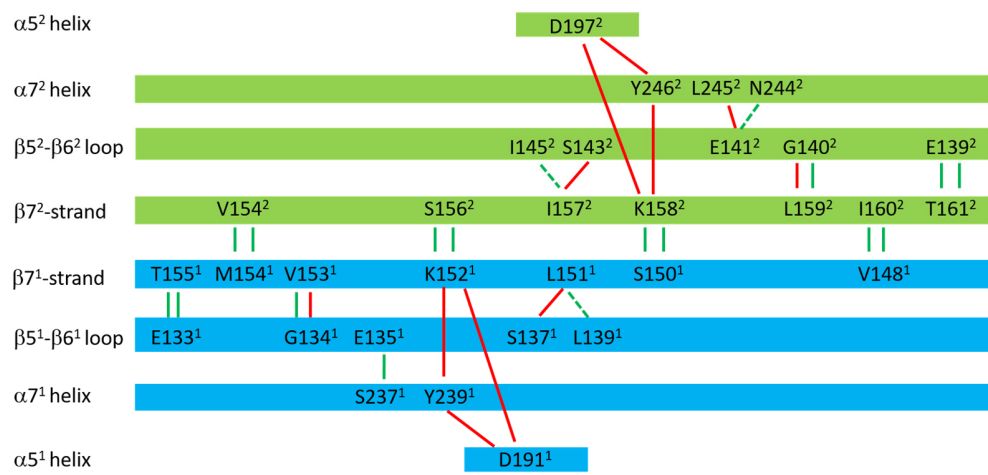

Supplement: Supplementary Information [file srep40921-s1.pdf]
